# Supplementary material
Source: HighWire-hosted journal article supplement (http://www.jrheum.org/highwire/filestream/29699/field_highwire_adjunct_files/0/141542DataSuppl.pdf)
Supplement: 141542DataSuppl.pdf [file 141542DataSuppl.pdf]

ONLINE SUPPLEMENTARY DATA

**Flow Diagram**

**Study Design: matched case-cohort study**

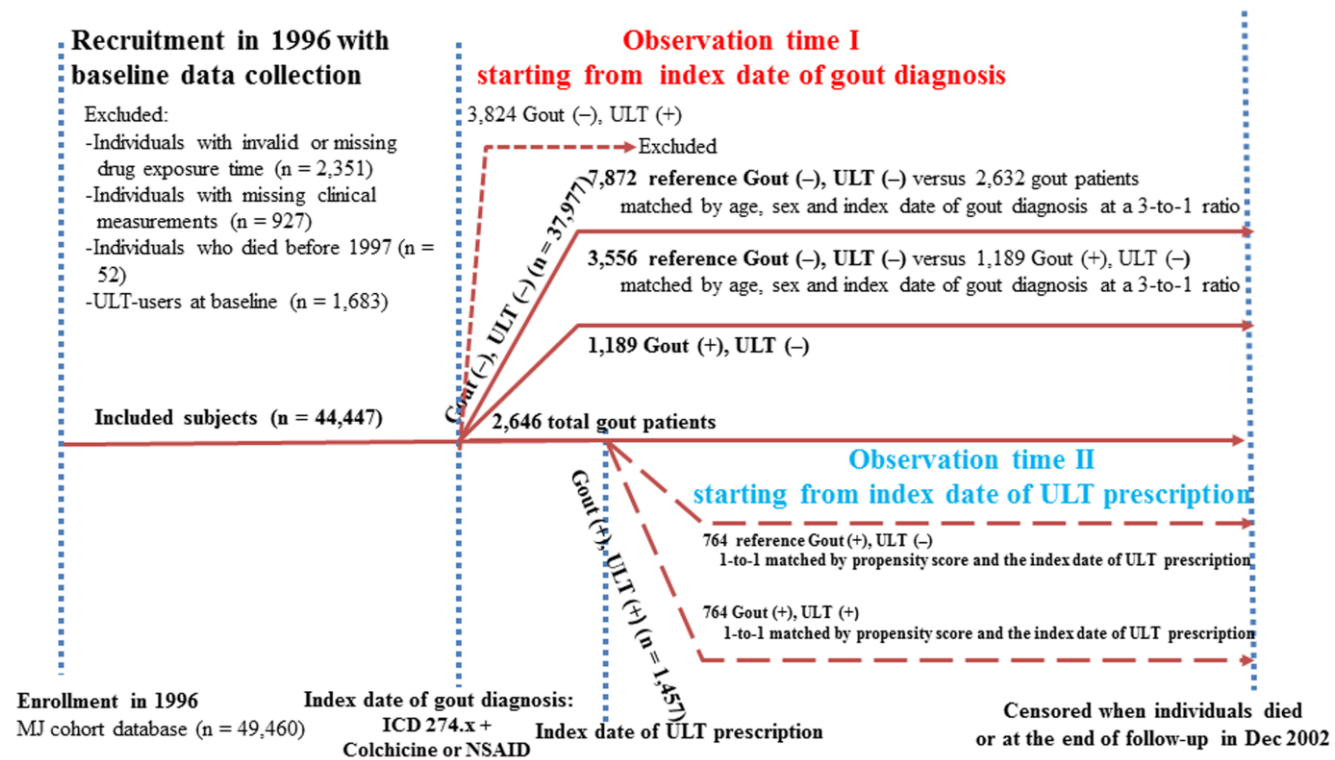

Supplementary Figure 1. Flow diagram of study design: matched case-cohort study

*Supplementary Table 1.* Demographic, lifestyle and clinical characteristics of the studied subjects (N = 40,623).

| <b>Characteristics</b>               | <b>Gout (-), ULT (-)<br/>N = 37,977</b> | <b>Gout (+), ULT (-)<br/>N = 1,189</b> | <b>Gout (+), ULT (+)<br/>N = 1,457</b> |
|--------------------------------------|-----------------------------------------|----------------------------------------|----------------------------------------|
| Age, years                           | 40.7 ± 14.2                             | 47.6 ± 15.2                            | 52.5 ± 15.1                            |
| Male, n (%)                          | 16251 (42.8)                            | 542 (45.6)                             | 1097 (75.3)                            |
| Follow up time, years                | 6.5 ± 0.6                               | 6.4 ± 0.8                              | 6.5 ± 0.6                              |
| Uric acid, mg/dL                     | 5.7 ± 1.4                               | 6.5 ± 1.8                              | 8.1 ± 1.8                              |
| SBP, mmHg                            | 119.4 ± 19.9                            | 124.3 ± 21.5                           | 134.2 ± 22.8                           |
| DBP, mmHg                            | 68.7 ± 11.3                             | 71.8 ± 12.0                            | 77.2 ± 12.2                            |
| Cholesterol, mg/dL                   | 200.1 ± 37.6                            | 204.0 ± 44.0                           | 211.6 ± 39.9                           |
| HDL-C, mg/dL                         | 46.8 ± 13.6                             | 46.6 ± 14.0                            | 44.2 ± 14.5                            |
| Triglyceride, mg/dL                  | 106.6 ± 66.4                            | 166.1 ± 87.2                           | 159.3 ± 84.3                           |
| Glucose, mg/dL                       | 98 ± 22.1                               | 133.1 ± 94.3                           | 104.6 ± 26.9                           |
| eGFR, mL/min per 1.73 m <sup>2</sup> | 83.2 ± 15.6                             | 77.6 ± 16.7                            | 69.9 ± 16.8                            |
| BMI, kg/m <sup>2</sup>               | 23 ± 3.4                                | 24.2 ± 3.6                             | 25.5 ± 3.3                             |
| <b>Co-morbidity*</b>                 |                                         |                                        |                                        |
| Hypertension, n (%)                  | 429 (1.1)                               | 33 (2.8)                               | 74 (5.1)                               |
| Heart disease, n (%)                 | 2176 (5.7)                              | 146 (12.3)                             | 307 (21.1)                             |
| Diabetes Mellitus, n (%)             | 145 (0.4)                               | 14 (1.2)                               | 18 (1.2)                               |
| <b>Alcohol drinking</b>              |                                         |                                        |                                        |
| Never, n (%)                         | 4644 (12.2)                             | 180 (15.1)                             | 167 (11.5)                             |

|                          |              |            |            |
|--------------------------|--------------|------------|------------|
| Abstained, n (%)         | 19212 (50.6) | 571 (48.0) | 565 (38.8) |
| 1–2 drinks/week, n (%)   | 940 (2.5)    | 42 (3.5)   | 82 (5.6)   |
| 3–4 drinks/week, n (%)   | 9211 (24.2)  | 261 (22.0) | 402 (27.6) |
| Daily, n (%)             | 3230 (8.5)   | 102 (8.6)  | 171 (11.7) |
| Missing data, n (%)      | 760 (2.0)    | 33 (2.8)   | 70 (4.8)   |
| <b>Cigarette smoking</b> |              |            |            |
| Never, n (%)             | 5925 (15.6)  | 208 (17.5) | 209 (14.3) |
| Abstained, n (%)         | 19257 (50.7) | 594 (50.0) | 572 (39.3) |
| Occasionally, n (%)      | 1892 (5.0)   | 73 (6.1)   | 166 (11.4) |
| Often, n (%)             | 1349 (3.6)   | 45 (3.8)   | 66 (4.5)   |
| Daily, n (%)             | 3702 (9.7)   | 111 (9.3)  | 149 (10.2) |
| Missing data, n (%)      | 5872 (15.5)  | 158 (13.3) | 295 (20.3) |
| <b>Smoking amount</b>    |              |            |            |
| None or missing, n (%)   | 27450 (72.2) | 871 (73.3) | 871 (59.8) |
| <5 per day, n (%)        | 1791 (4.7)   | 49 (4.1)   | 74 (5.1)   |
| 5–10 per day, n (%)      | 2045 (5.4)   | 59 (5.0)   | 113 (7.8)  |
| 11–19 per day, n (%)     | 4699 (12.4)  | 133 (11.2) | 258 (17.7) |
| 1–2 packs per day, n (%) | 1992 (5.2)   | 74 (6.2)   | 139 (9.5)  |
| >2 packs per day, n (%)  | 20 (0.1)     | 3 (0.3)    | 2 (0.1)    |

\* Definition of co-morbidity: Hypertension is defined as systolic blood pressure (SBP)  $\geq$  140 mmHg or diastolic blood pressure (DBP)  $\geq$  90 mmHg or self-reported to have hypertension or use of antihypertensive medications. Heart disease is defined as abnormal ECG, or self-reported heart disease or medication use for heart disease. Diabetes is defined as fasting blood sugar  $\geq$  126 mg/dL or self-reported diabetes mellitus or use

of anti-diabetic medications. With respect to alcohol consumption and cigarette smoking, “Never” indicates the subjects have never been exposed to either alcohol or cigarette and “Abstained” indicates that although the subjects have been exposed before, they have stopped the usage. ULT: urate-lowering therapy; SBP: systolic blood pressure; DBP: diastolic blood pressure; HDL-C: high density lipoprotein-cholesterol; eGFR: estimated glomerular filtration rate; BMI: body mass index.

*Supplementary Table 2.* Demographics of gout patients with allopurinol-only use or benzbromarone-only use and their matched references.

| <b>Characteristics</b>               | <b>Gout (+),<br/>Allopurinol (+)</b> | <b>Gout (+),<br/>ULT (-)</b> | <b><i>p</i></b> | <b>Gout (+)<br/>Benzbromarone (+)</b> | <b>Gout (+),<br/>ULT (-)</b> | <b><i>p</i></b> |
|--------------------------------------|--------------------------------------|------------------------------|-----------------|---------------------------------------|------------------------------|-----------------|
| Age, years                           | 52.7 ± 15.4                          | 53.2 ± 15.3                  | 0.67            | 51.0 ± 15.1                           | 50.8 ± 15.6                  | 0.81            |
| Male, n (%)                          | 89 (31.1)                            | 95 (33.2)                    | 0.59            | 357 (70.8)                            | 364 (72.2)                   | 0.99            |
| Follow-up time, years                | 6.4 ± 0.8                            | 6.2 ± 1.1                    | 0.07            | 6.5 ± 0.5                             | 6.4 ± 0.9                    | <0.01           |
| Uric acid, mg/dL                     | 7.7 ± 1.7                            | 7.5 ± 1.8                    | 0.29            | 7.7 ± 1.7                             | 7.7 ± 1.7                    | 0.99            |
| SBP, mmHg                            | 130.5 ± 22.5                         | 130.5 ± 22.1                 | 0.99            | 132.3 ± 22.5                          | 130.9 ± 22.0                 | 0.35            |
| DBP, mmHg                            | 78.4 ± 12.1                          | 77.7 ± 10.6                  | 0.32            | 78.4 ± 11.8                           | 77.5 ± 11.7                  | 0.29            |
| Cholesterol, mg/dL                   | 211.2 ± 47.3                         | 211.9 ± 38.4                 | 0.83            | 210.8 ± 41.3                          | 208.0 ± 42.0                 | 0.29            |
| HDL-C, mg/dL                         | 43.9 ± 12.8                          | 45.4 ± 18.4                  | 0.22            | 41.9 ± 13.7                           | 43.7 ± 16.2                  | 0.35            |
| Triglyceride, mg/dL                  | 146.8 ± 78.9                         | 158.9 ± 136.3                | 0.19            | 159.2 ± 89.6                          | 158.4 ± 118.1                | 0.90            |
| Glucose, mg/dL                       | 103.6 ± 24.7                         | 109.0 ± 36.1                 | 0.04            | 104.3 ± 25.3                          | 105.2 ± 29.7                 | 0.60            |
| eGFR, mL/min per 1.73 m <sup>2</sup> | 70.2 ± 16.1                          | 71.7 ± 16.4                  | 0.27            | 73.0 ± 16.0                           | 73.4 ± 16.4                  | 0.68            |
| BMI, kg/m <sup>2</sup>               | 25.3 ± 3.5                           | 25.4 ± 3.5                   | 0.68            | 25.4 ± 3.3                            | 25.0 ± 3.3                   | 0.13            |
| <b>Co-morbidity</b>                  |                                      |                              |                 |                                       |                              |                 |

|                          |            |            |      |            |            |       |
|--------------------------|------------|------------|------|------------|------------|-------|
| Hypertension, n (%)      | 11 (3.8)   | 13 (4.5)   | 0.68 | 33 (6.5)   | 53 (10.5)  | <0.01 |
| Heart disease, n (%)     | 51 (17.8)  | 54 (18.9)  | 0.75 | 146 (29.0) | 330 (65.5) | <0.01 |
| Diabetes Mellitus, n (%) | 4 (1.4)    | 6 (2.1)    | 0.52 | 14 (2.8)   | 30 (6.0)   | 0.30  |
| <b>Alcohol drinking</b>  |            |            | 0.13 |            |            | 0.51  |
| Never, n (%)             | 29 (10.1)  | 43 (15)    |      | 53 (10.5)  | 65 (12.9)  |       |
| Abstained, n (%)         | 130 (45.5) | 116 (40.6) |      | 187 (37.1) | 199 (39.5) |       |
| 1–2 drinks/week, n (%)   | 10 (3.5)   | 20 (7)     |      | 27 (5.4)   | 26 (5.2)   |       |
| 3–4 drinks/week, n (%)   | 77 (26.9)  | 67 (23.4)  |      | 151 (30)   | 148 (29.4) |       |
| Daily, n (%)             | 31 (10.8)  | 27 (9.4)   |      | 61 (12.1)  | 46 (9.1)   |       |
| Missing data, n (%)      | 9 (3.1)    | 13 (4.5)   |      | 25 (5)     | 20 (4)     |       |
| <b>Cigarette smoking</b> |            |            | 0.62 |            |            | 0.53  |
| Never, n (%)             | 38 (13.3)  | 46 (16.1)  |      | 73 (14.5)  | 75 (14.9)  |       |
| Abstained, n (%)         | 118 (41.3) | 121 (42.3) |      | 196 (38.9) | 215 (42.7) |       |
| Occasionally, n (%)      | 35 (12.2)  | 28 (9.8)   |      | 49 (9.7)   | 44 (8.7)   |       |
| Often, n (%)             | 15 (5.2)   | 13 (4.5)   |      | 19 (3.8)   | 24 (4.8)   |       |
| Daily, n (%)             | 19 (6.6)   | 26 (9.1)   |      | 64 (12.7)  | 48 (9.5)   |       |
| Missing data, n (%)      | 61 (21.3)  | 52 (18.2)  |      | 103 (20.4) | 98 (19.4)  |       |
| <b>Smoking amount</b>    |            |            | 0.62 |            |            | 0.04  |
| None or missing, n (%)   | 174 (60.8) | 184 (64.3) |      | 311 (61.7) | 317 (62.9) |       |
| <5 per day, n (%)        | 17 (5.9)   | 12 (4.2)   |      | 22 (4.4)   | 16 (3.2)   |       |
| 5–10 per day, n (%)      | 19 (6.6)   | 16 (5.6)   |      | 44 (8.7)   | 31 (6.2)   |       |
| 11–19 per day, n (%)     | 41 (14.3)  | 39 (13.6)  |      | 96 (19)    | 84 (16.7)  |       |

|                          |           |           |          |           |
|--------------------------|-----------|-----------|----------|-----------|
| 1–2 packs per day, n (%) | 35 (12.2) | 33 (11.5) | 31 (6.2) | 55 (10.9) |
| >2 packs per day, n (%)  | 0 (0)     | 2 (0.7)   | 0 (0)    | 1 (0.2)   |

Gout (+), allopurinol (+): gout patients treated with allopurinol-only (n = 286). Gout (+), benzbromarone (+): gout patients treated with benzbromarone-only (n = 504). Gout (–), ULT (–): 1-to-1 matched counterparts of non-ULT-users to subgroups of Gout (+), allopurinol (+) (n = 286) and Gout (+), benzbromarone (+) (n = 504) by propensity score and index date of the ULT prescription. ULT: urate-lowering therapy; SBP: systolic blood pressure; DBP: diastolic blood pressure; HDL-C: high density lipoprotein-cholesterol; eGFR: estimated glomerular filtration rate; BMI: body mass index.

*Supplementary Table 3.* Mortality risk according to the presence of ULT use in subgroups stratified by concomitant medications and by duration of ULT use.

| Characteristics                 | ULT | Number | Person-years | All-cause mortality |                                  |      |                          |          |
|---------------------------------|-----|--------|--------------|---------------------|----------------------------------|------|--------------------------|----------|
|                                 |     |        |              | Event number        | Mortality (10 <sup>-3</sup> P-Y) | MRR  | <sup>a</sup> HR (95% CI) | <i>p</i> |
| <b><i>Concomitant drugs</i></b> |     |        |              |                     |                                  |      |                          |          |
| Anti-hypertensive (–)           | –   | 121    | 785          | 2                   | <b>2.55</b>                      |      | Reference                |          |
|                                 | +   | 121    | 800.4        | 0                   | <b>0.00</b>                      | 0    | NA                       | NA       |
| Anti-hypertensive (+)           | –   | 243    | 1524.2       | 26                  | <b>17.06</b>                     |      | Reference                |          |
|                                 | +   | 243    | 1577.4       | 11                  | <b>6.97</b>                      | 0.41 | 0.41(0.20–0.82)          | 0.01     |
| Anti-diabetic (–)               | –   | 496    | 3184.3       | 22                  | <b>6.91</b>                      |      | Reference                |          |
|                                 | +   | 496    | 3237.1       | 11                  | <b>3.40</b>                      | 0.49 | 0.50(0.24–1.00)          | 0.05     |
| Anti-diabetic (+)               | –   | 10     | 60.4         | 1                   | <b>16.56</b>                     |      | Reference                |          |
|                                 | +   | 10     | 65.6         | 0                   | <b>0.00</b>                      | 0    | NA                       | NA       |
| Lipid-lowering agent (–)        | –   | 563    | 3604.7       | 33                  | <b>9.15</b>                      |      | Reference                |          |
|                                 | +   | 563    | 3661.5       | 16                  | <b>4.37</b>                      | 0.48 | 0.47(0.26–0.86)          | 0.01     |
| Lipid-lowering agent (+)        | –   | 6      | 38.8         | 0                   | <b>0.00</b>                      |      | Reference                |          |

|                                   |   |     |        |    |              |      |                 |       |
|-----------------------------------|---|-----|--------|----|--------------|------|-----------------|-------|
|                                   | + | 6   | 40.6   | 0  | <b>0.00</b>  | NA   | NA              | NA    |
| <b><i>Duration of ULT use</i></b> |   |     |        |    |              |      |                 |       |
| <60 days                          | – | 256 | 1664.7 | 5  | <b>3.00</b>  |      | Reference       |       |
|                                   | + | 256 | 1653.2 | 7  | <b>4.23</b>  | 1.41 | 1.44(0.46–4.52) | 0.54  |
| 60–364 days                       | – | 121 | 768.9  | 8  | <b>10.40</b> |      | Reference       |       |
|                                   | + | 121 | 786.9  | 9  | <b>11.44</b> | 1.10 | 1.09(0.42–2.83) | 0.86  |
| 1–2 years                         | – | 90  | 587.1  | 3  | <b>5.11</b>  |      | Reference       |       |
|                                   | + | 90  | 581.3  | 3  | <b>5.16</b>  | 1.01 | 1.10(0.22–5.46) | 0.91  |
| >2 years                          | – | 297 | 1865.8 | 28 | <b>15.01</b> |      | Reference       |       |
|                                   | + | 297 | 1944.6 | 4  | <b>2.06</b>  | 0.14 | 0.14(0.05–0.39) | <0.01 |

<sup>a</sup> HRs were adjusted for age, gender, lifestyle (smoking, drinking and exercise) and comorbidity (obesity, hypertension, diabetes, renal failure and hepatitis). ULT: urate-lowering therapy; P-Y: person-years; MRR: mortality rate ratio; NA: result not available.
